# Supplementary material for: Photon-level broadband spectroscopy and interferometry with two frequency combs
Source: PubMed Central journal article supplement — Proc Natl Acad Sci U S A. 2020 Oct 14;117(43):26688–91. doi: 10.1073/pnas.2010878117 (PMC7604441; doi:10.1073/pnas.2010878117), 2020-10-14
Supplement: pnas.2010878117.sapp.pdf [file pnas.2010878117.sapp.pdf]

# PNAS

[www.pnas.org](http://www.pnas.org)

Supplementary Information for

## Photon-level broadband spectroscopy and interferometry with two frequency combs

Nathalie Picqué<sup>1</sup> and Theodor W. Hänsch<sup>1,2</sup>.

1. Max-Planck Institute of Quantum Optics  
Hans-Kopfermann-Str. 1, 85748 Garching, Germany
2. Ludwig-Maximilian University of Munich, Faculty of Physics,  
Schellingstr. 4, 80799 Munich, Germany

\* Nathalie Picqué, Email: [nathalie.picque@mpq.mpg.de](mailto:nathalie.picque@mpq.mpg.de)  
Theodor W. Hänsch, Email: [t.w.haensch@mpq.mpg.de](mailto:t.w.haensch@mpq.mpg.de)

### **This PDF file includes:**

Figures S1

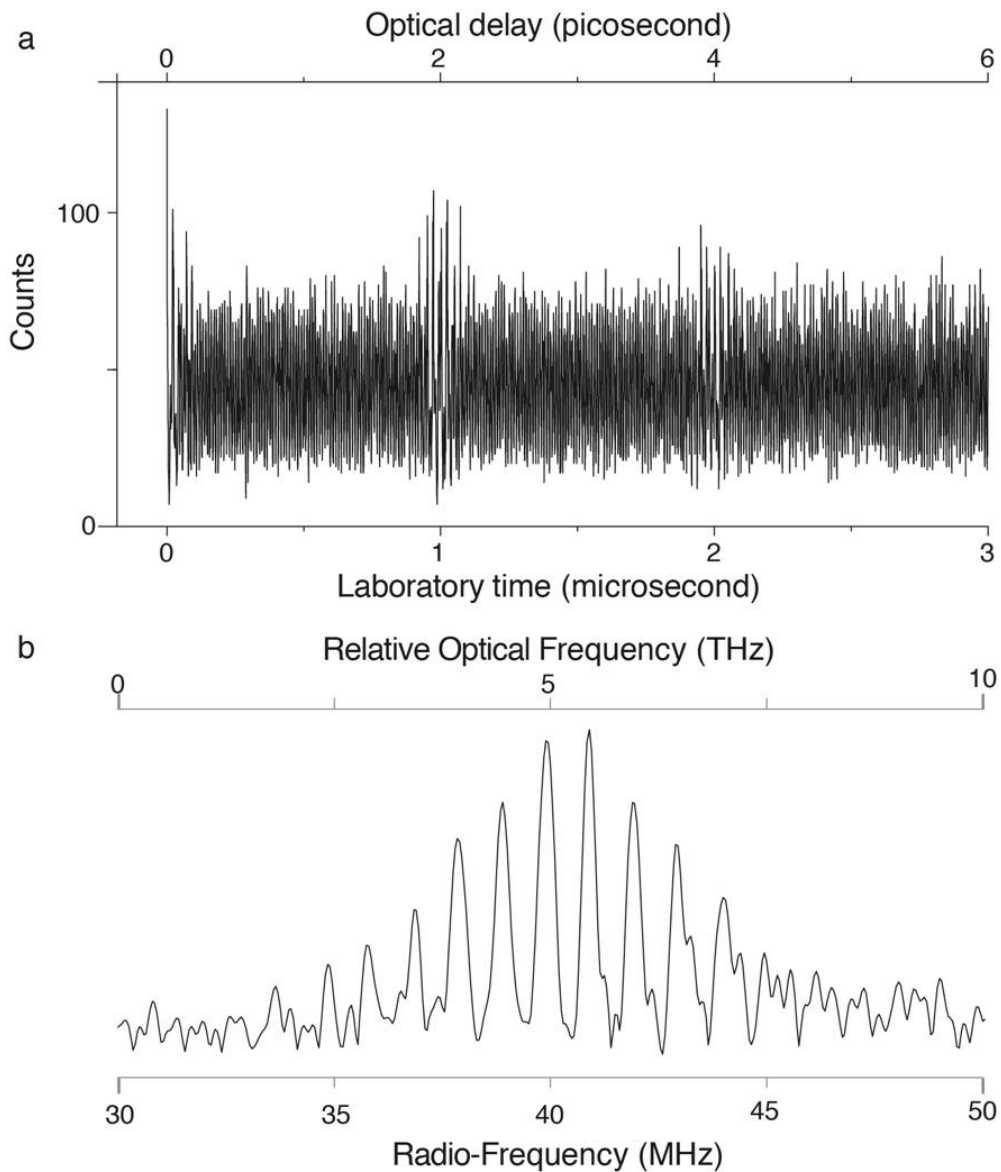

**Fig. S1. Experimental dual-comb interferogram and spectrum under an average power of 20 femtowatt at the detector.**

a. Interferogram comprising only 168703 detected clicks. Fig. 3 provides a magnified representation, after numerical filtering, of this interferogram around optical delays of 2 ps.  
 b. Spectrum, Fourier transform of the interferogram, retrieved at a power level one billion-fold lower than usual dual-comb spectra.
